# Supplementary material
Source: PubMed Central journal article supplement (PMC3359406)
Supplement: NIHMS348544-supplement-01.pdf [file NIHMS348544-supplement-01.pdf]

## ONLINE SUPPLEMENT

Online Table 1. Patient Characteristics and Association with Mortality by Phase

| Variable               | Mean±SD<br>or % | Early Phase |         | Constant Phase |         |
|------------------------|-----------------|-------------|---------|----------------|---------|
|                        |                 | HR          | P-value | HR             | P-value |
| RVPAS vs. MBTS         | 51% vs<br>49%   | 0.58        | .002    | 1.64           | .32     |
| <b>Prenatal</b>        |                 |             |         |                |         |
| Prenatal Diagnosis     | 77%             | .87         | .45     | 1.89           | .38     |
| Fetal intervention     | 2.7%            | -           | -       | -              | -       |
| <b>Birth</b>           |                 |             |         |                |         |
| Gestational Age, weeks | 38.2±1.6        | .89         | .030    | 0.65           | <.001   |
| Gest. Age < 37 weeks   | 12%             | 2.31        | <.001   | 3.61           | .028    |
| Apgar at 1 min         | 7.6±1.6         | 0.94        | .21     | .0.997         | .94     |
| Apgar at 5 min         | 8.6±0.8         | .85         | .07     | 0.89           | .61     |
| Birth weight, kg       | 3.10±5.41       | 0.59        | .001    | 0.69           | .42     |
| Birth weight<2.5 kg    | 14%             | 2.10        | <.001   | 2.13           | .21     |
| Birth weight<1.5 kg    | 0.4%            | 2.96        | .29     | 18.4           | .006    |

Table 1, continued.

| Variable                                         | Mean±SD<br>or % | Early Phase |                     | Late Phase       |                     |
|--------------------------------------------------|-----------------|-------------|---------------------|------------------|---------------------|
|                                                  |                 | HR          | <i>P</i> -<br>value | HR               | <i>P</i> -<br>value |
| <b>Demographic</b>                               |                 |             |                     |                  |                     |
| Male                                             | 62%             | 0.81        | .22                 | 2.04             | .25                 |
| Hispanic                                         | 19%             | 1.06        | .88                 | 0.58             | .68                 |
| White race                                       | 80%             | 0.80        | .27                 | 0.68             | .50                 |
| SES score, U.S. census<br>(per 5-point decrease) | 0.05±5.08       | 1.27        | .006                | 0.88             | .57                 |
| <b>Anatomy</b>                                   |                 |             |                     |                  |                     |
| HLHS                                             | 88%             | 0.60        | .019                | 1.90             | .54                 |
| Aortic atresia, Mitral<br>atresia                | 38%             | 0.93        | .69                 | 1.14             | .81                 |
| Aortic atresia, Mitral<br>stenosis               | 25%             | 1.22        | .49                 | 0.44             | .40                 |
| Aortic stenosis, Mitral<br>stenosis              | 12%             | 0.32        | .008                | 2.22             | .19                 |
| Any aortic atresia                               | 62%             | 1.07        | .70                 | 0.53             | .25                 |
| Obstructed PV drainage                           | 3.5%            | 4.30        | <.001               | Not<br>estimable |                     |

Table 1, continued.

| Variable                                           | Mean±SD<br>or % | Early Phase |         | Late Phase |         |
|----------------------------------------------------|-----------------|-------------|---------|------------|---------|
|                                                    |                 | HR          | P-value | HR         | P-value |
| Total anomalous pulmonary venous return            | 1.6%            | 2.09        | .33     | 8.25       | .27     |
| Ascending aorta diameter, mm                       | 3.15±1.75       | 0.87        | .018    | 1.07       | .56     |
| Genetic syndrome ( <b>yes</b> vs. no)              | 5%              | 1.48        | .45     | 7.91       | .001    |
| Genetic syndrome ( <b>unknown</b> vs. no)          | 32%             | 3.30        | <.001   | 2.78       | .049    |
| Non-syndromic abnormality ( <b>yes</b> vs. no)     | 19%             | 0.77        | .43     | 2.02       | .22     |
| Non-syndromic abnormality ( <b>unknown</b> vs. no) | 32%             | 3.00        | <.001   | 2.89       | .05     |
| <b>Pre-Norwood Echo</b>                            |                 |             |         |            |         |
| Patent aortic valve                                | 42%             | 0.88        | .35     | 1.66       | .28     |
| ASD mean Doppler gradient, mmHg                    | 5.0±3.0         | 1.02        | .55     | 0.97       | .69     |

Table 1, continued.

| Variable                                   | Mean±SD<br>or %   | Early Phase |         | Late Phase |         |
|--------------------------------------------|-------------------|-------------|---------|------------|---------|
|                                            |                   | HR          | P-value | HR         | P-value |
| Fractional area change                     | 0.35±0.09         | 2.07        | .49     | 0.63       | .91     |
| LV present                                 | 69%               | 0.95        | .77     | 1.26       | .68     |
| Moderate/severe tricuspid regurgitation    | 12%               | 1.24        | .42     | 2.54       | .13     |
| Moderate/severe mitral regurgitation       | 4%                | 0.41        | .29     | .008       | .58     |
| Moderate/severe aortic valve regurgitation | 0.8%              | 0.10        | .54     | ~0         | 0.40    |
| <b>Pre-operative</b>                       |                   |             |         |            |         |
| Median highest Lactate, mmol/L (IQR)       | 3.1<br>(2.5, 4.5) | 1.06        | .018    | 0.84       | .26     |
| Mechanical ventilation                     | 48%               | 1.73        | .002    | 0.97       | .95     |
| Pre-Norwood apnea                          | 14%               | 1.34        | .18     | 0.94       | .89     |

Table 1, continued.

| Variable                                       | Mean±SD<br>or %         | Early Phase |         | Late Phase |         |
|------------------------------------------------|-------------------------|-------------|---------|------------|---------|
|                                                |                         | HR          | P-value | HR         | P-value |
| Pre-Norwood shock                              | 2.6%                    | -           | -       | -          | -       |
| Pre-Norwood respiratory failure                | 13%                     | 1.09        | .76     | 3.02       | .045    |
| Pre-Norwood metabolic acidosis                 | 5.7%                    | 1.05        | .99     | 0.69       | .97     |
| Pre-Norwood cath intervention                  | 5.1%                    | 2.24        | .005    | 0          | .95     |
| # Pre-Norwood cath intervention [median (IQR)] | 0.07±0.32<br>[0 (0,0)]  | 2.24        | .005    | ~0         | .95     |
| Pre-Norwood non-cardiac surgery                | 1.5%                    | 0.53        | .69     | 4.55       | .19     |
| Pre-Norwood any surgery                        | 2.0%                    | -           | -       | -          | -       |
| #Pre-Norwood total surgeries [median (IQR)]    | 0.02±0.17<br>[0, (0,0)] | 1.21        | .61     | 1.42       | .75     |

Table 1, continued.

| Variable                                  | Mean±SD<br>or %        | Early Phase |         | Late Phase |         |
|-------------------------------------------|------------------------|-------------|---------|------------|---------|
|                                           |                        | HR          | P-value | HR         | P-value |
| Pre-Norwood complications                 | 28%                    | 1.57        | .011    | 1.14       | .80     |
| #Pre-Norwood complications [median (IQR)] | 0.58±1.23<br>[0 (0,1)] | 1.16        | .003    | 0.91       | .71     |

SD = standard deviation; HR = hazard ratio

RVPAS = right ventricle to pulmonary artery shunt; MBTS = modified Blalock-Taussig Shunt; SES = socioeconomic score; HLHS = hypoplastic left heart syndrome; ASD = atrial septal defect

**Online Table 2. Results Summary for Cardiac Transplant Risk Factors with univariate *P*-value <0.2, and for Shunt Type**

| Variable                                                  | Transplant<br>Mean±SD | No Transplant<br>or % (n) | Hazard<br>Ratio             | 95% CI       | <i>P</i> -<br>value |
|-----------------------------------------------------------|-----------------------|---------------------------|-----------------------------|--------------|---------------------|
| N                                                         | 19                    | 530                       |                             |              |                     |
| RVPAS vs. MBTS                                            | 63% (12)              | 51% (269)                 | 1.43                        | (0.56, 3.63) | .45                 |
| Male vs. female                                           | 42% (8)               | 63% (332)                 | 0.42                        | (0.17, 1.04) | .06                 |
| Percentage in census tract<br>below federal poverty level | 7.6±7.2               | 13.1±12.4                 | 1.31 per 5%<br>increase     | (0.96, 1.80) | .09                 |
| HLHS                                                      | 74% (14)              | 88% (467)                 | 0.33                        | (0.19, 0.55) | .03                 |
| HLHS with AS/MS                                           | 5% (1)                | 21% (109)                 | 0.18                        | (0.02, 1.36) | .10                 |
| HLHS with AS/MA                                           | 11% (2)               | 3% ( 15)                  | 4.05                        | (0.94, 17.5) | .06                 |
| Total anomalous<br>pulmonary venous<br>connection         | 5% (1)                | 2% ( 8)                   | 6.03                        | (0.80, 45.6) | .08                 |
| Pre-Norwood<br>moderate/severe tricuspid<br>regurgitation | 32% (6)               | 11% ( 59)                 | 3.86                        | (2.29, 6.18) | .006                |
| Pre-Norwood RV %area<br>change                            | 30±9                  | 35±8                      | 1.43 per 5-unit<br>decrease | (1.09, 1.85) | .009                |
| Total number of pre-<br>Norwood surgeries*                | 0.11±0.46             | 0.02±0.15                 | 4.21                        | (1.30, 13.7) | .017                |

\*Includes 1 subject with atrial septectomy and bilateral pulmonary artery bands; 2 subjects with bowel surgery; 1 extracorporeal membrane oxygenation; 1 exploratory laparotomy; 1 choanal atresia and stent placement; and 1 tracheoesophageal fistula repair

AS = aortic stenosis; CI = confidence interval; HLHS = hypoplastic left heart syndrome; MA = mitral atresia; MBTS = modified Blalock-Taussig

Shunt; MS = mitral stenosis RV = right ventricular; RVPAS = right ventricle to pulmonary artery shunt;

ACCEPTED MANUSCRIPT
